# Supplementary material for: Metal–organic framework combined with CaO2 nanoparticles for enhanced and targeted photodynamic therapy
Source: Royal Society of Chemistry journal article supplement (doi:10.1039/d1na00610j), 2021-01-01
Supplement: d1na00610j1.pdf [file d1na00610j1.pdf]

# Supporting Information

## Metal-Organic Framework Combined with CaO<sub>2</sub> Nanoparticles for Enhanced and Targeted Photodynamic Therapy

Xinran Sun, Kaixiu Chen, Yingyan Liu, Guoda Zhang, Min Shi, Pengfei Shi<sup>a\*</sup> and

Shusheng Zhang<sup>a\*</sup>

Shandong Provincial Key Laboratory of Detection Technology for Tumor Markers,  
School of Chemistry and Chemical Engineering, Linyi University, Linyi 276000,  
Shandong, P. R. China.

### Contents

|                                                                                                                                     |   |
|-------------------------------------------------------------------------------------------------------------------------------------|---|
| <b>Fig. S1</b> Particle size distribution of PCN-224 and PCN-224-CaO <sub>2</sub> -HA.                                              | 2 |
| <b>Fig. S2</b> EDS of PCN-224-CaO <sub>2</sub> -HA.                                                                                 | 2 |
| <b>Fig. S3</b> The dissolved O <sub>2</sub> content of different materials dispersed in water.                                      | 3 |
| <b>Fig. S4</b> TEM image of CaO <sub>2</sub> -HA.                                                                                   | 3 |
| <b>Fig. S5</b> FT-IR spectra of CaO <sub>2</sub> -HA, PCN-224 and PCN-224-CaO <sub>2</sub> -HA.                                     | 4 |
| <b>Fig. S6</b> PXRD patterns of PCN-224, PCN-224-CaO <sub>2</sub> -HA and the simulated of PCN-224 and CaO <sub>2</sub> .           | 4 |
| <b>Fig. S7</b> The UV-vis absorption of H <sub>2</sub> TCPP with different concentrations.                                          | 5 |
| <b>Fig. S8</b> Relationship between UV-vis absorption intensity and the concentration of H <sub>2</sub> TCPP.                       | 5 |
| <b>Fig. S9</b> DCFH fluorescence intensity of CaO <sub>2</sub> -HA, PCN-224 and PCN-224-CaO <sub>2</sub> -HA after LED irradiation. | 6 |
| <b>Fig. S10</b> UV-vis absorption of PCN-224 combined with different amounts of CaO <sub>2</sub> .                                  | 6 |
| <b>Fig. S11</b> CLSM images of Calcein-AM/PI stained LO2 cells.                                                                     | 7 |
| <b>Fig. S12</b> CLSM images of ROS generation in LO2 cells.                                                                         | 7 |
| <b>Fig. S13</b> Body weight after various treatments.                                                                               | 8 |
| <b>Fig. S14</b> H&E stained images obtained from major organs after 14 days by intravenous injection.                               | 8 |

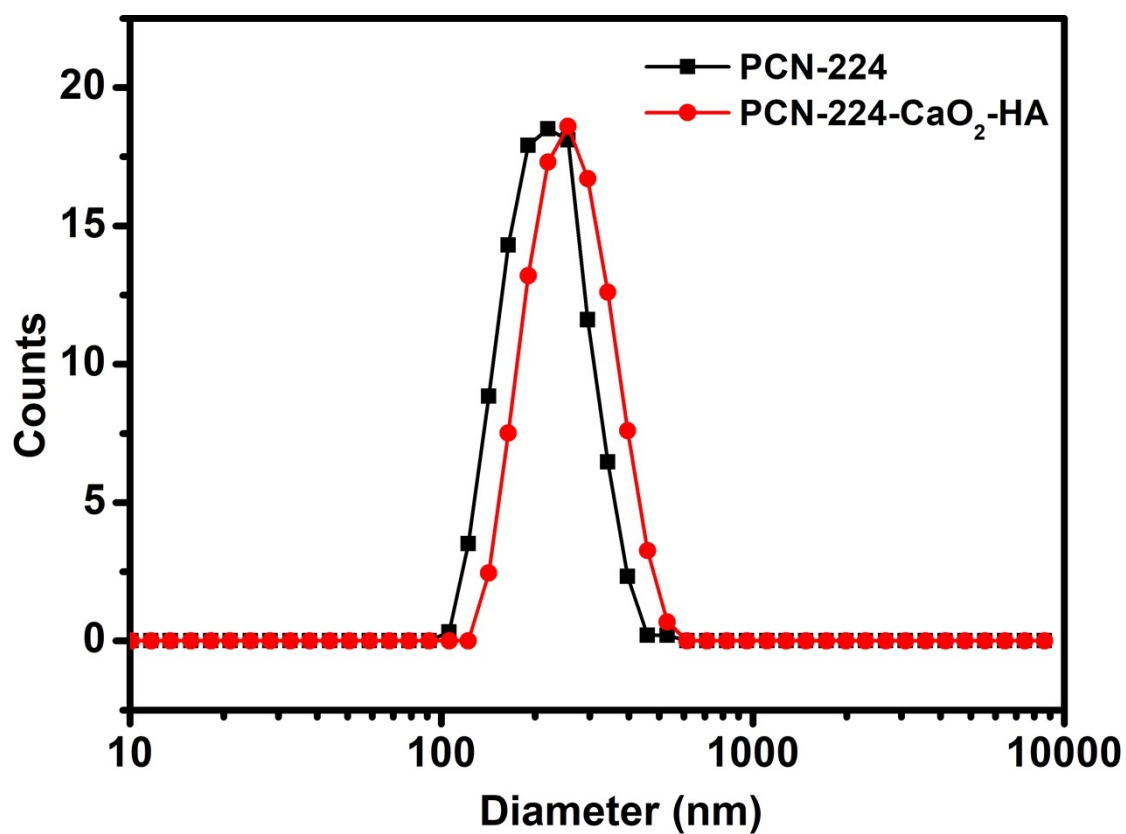

**Fig. S1** Particle size distribution of PCN-224 and PCN-224-CaO<sub>2</sub>-HA in water.

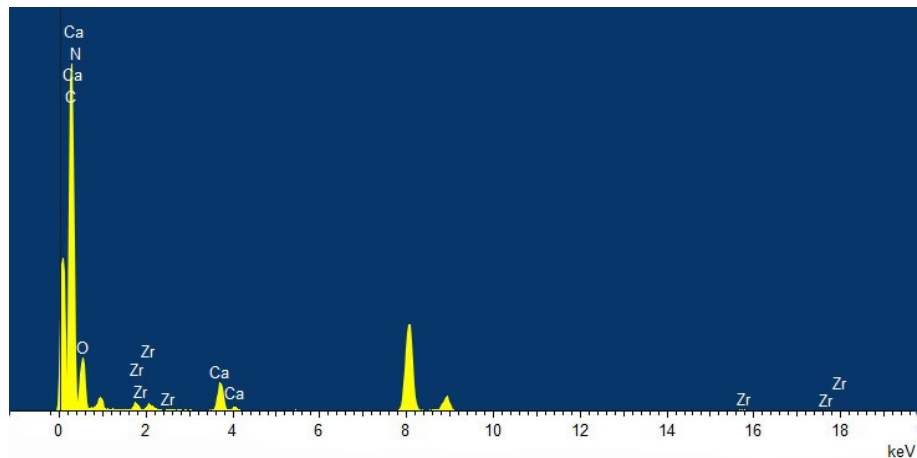

**Fig. S2** EDS of PCN-224-CaO<sub>2</sub>-HA.

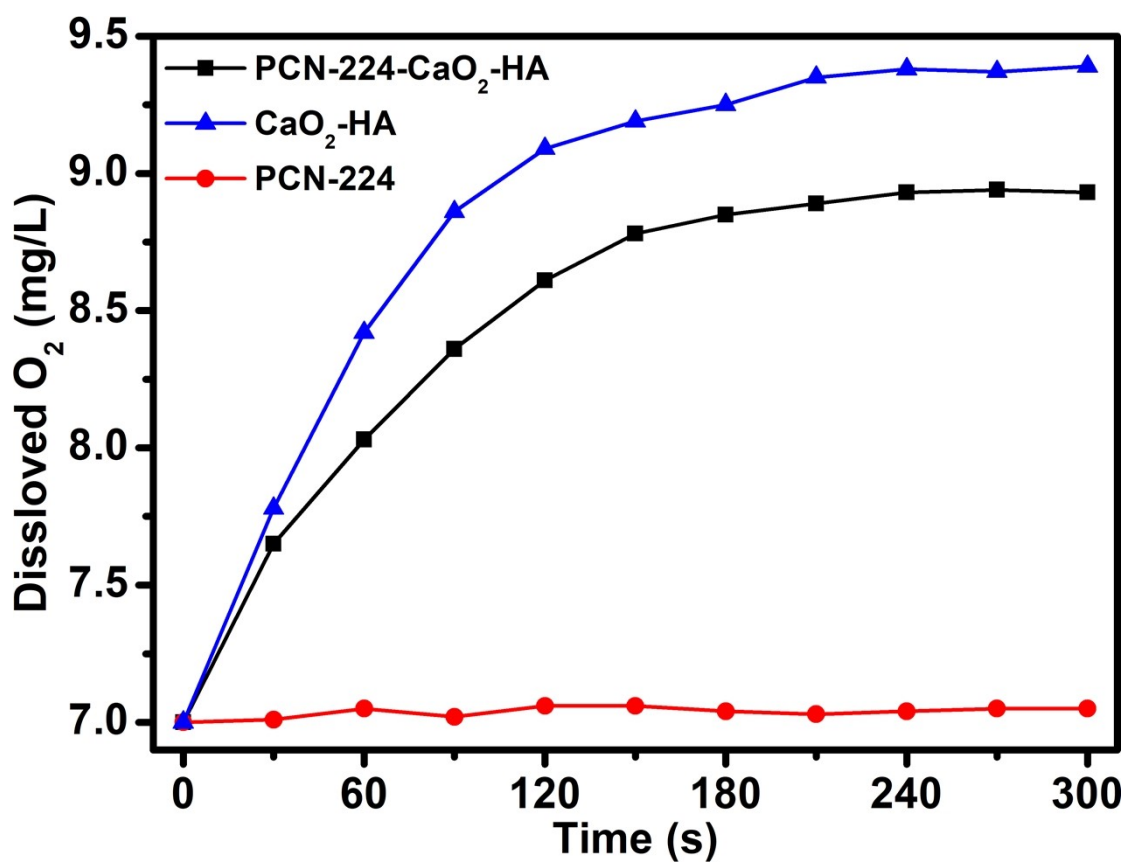

Fig. S3 The dissolved O<sub>2</sub> content of different materials dispersed in water.

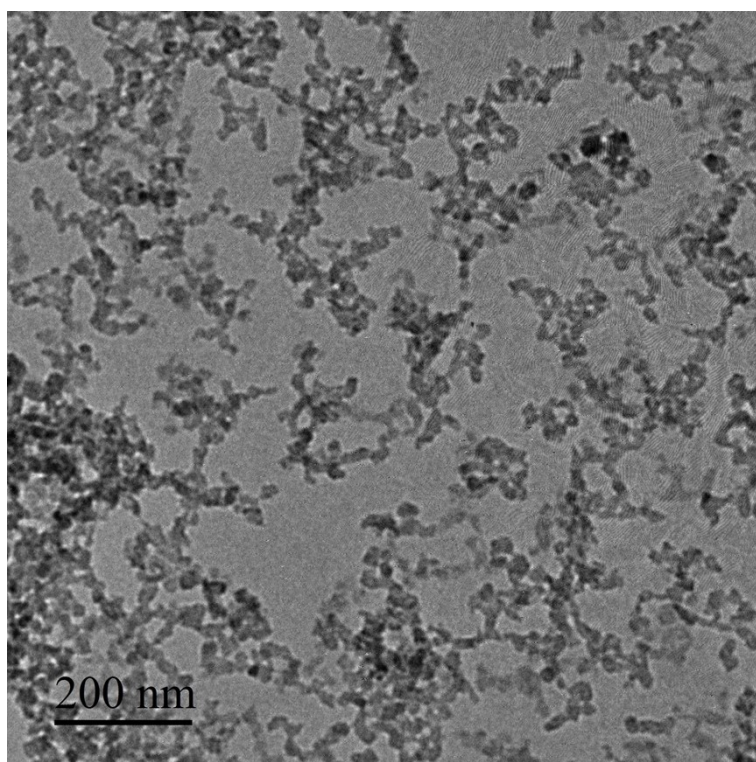

Fig. S4 TEM images of CaO<sub>2</sub>-HA.

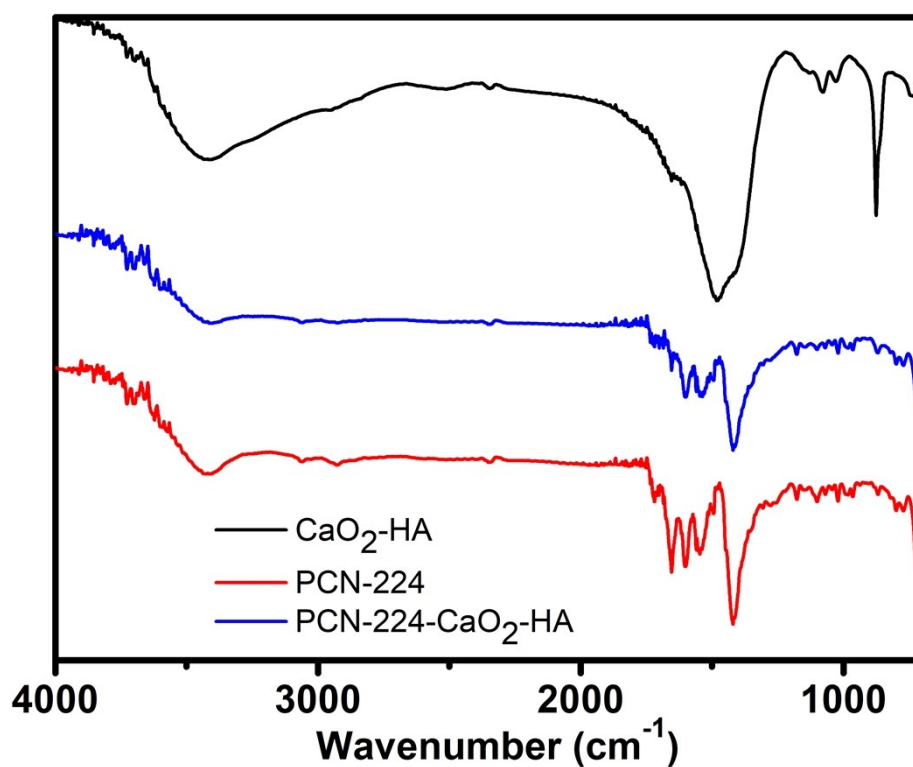

**Fig. S5** FT-IR spectra of CaO<sub>2</sub>-HA, PCN-224 and PCN-224-CaO<sub>2</sub>-HA.

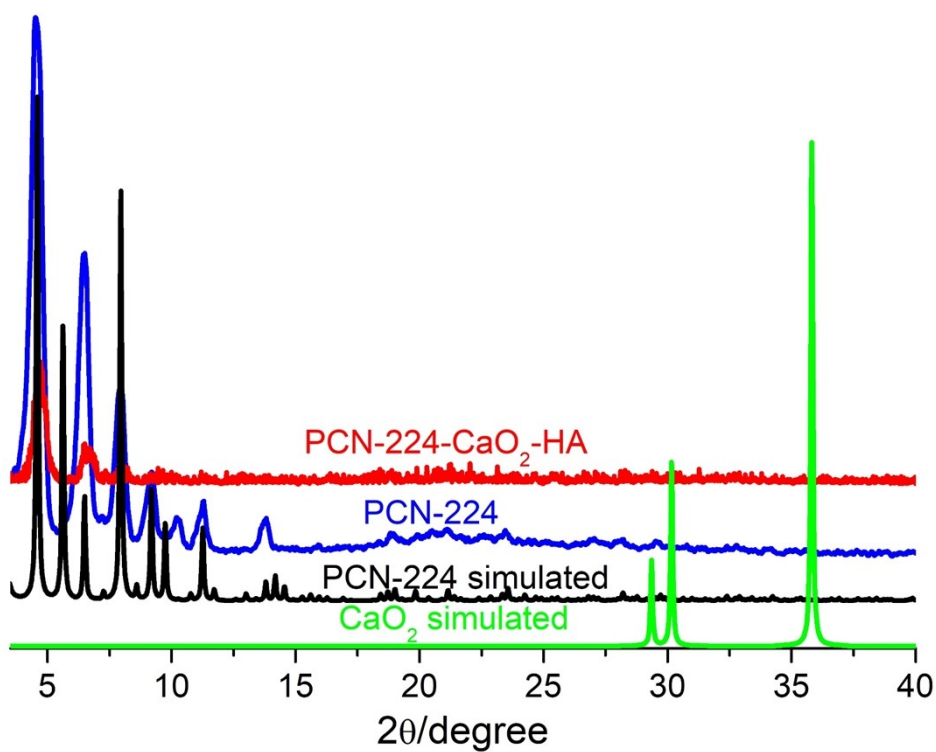

**Fig. S6** PXRD patterns of PCN-224, PCN-224-CaO<sub>2</sub>-HA and the simulated from the crystal data of PCN-224 and CaO<sub>2</sub>.

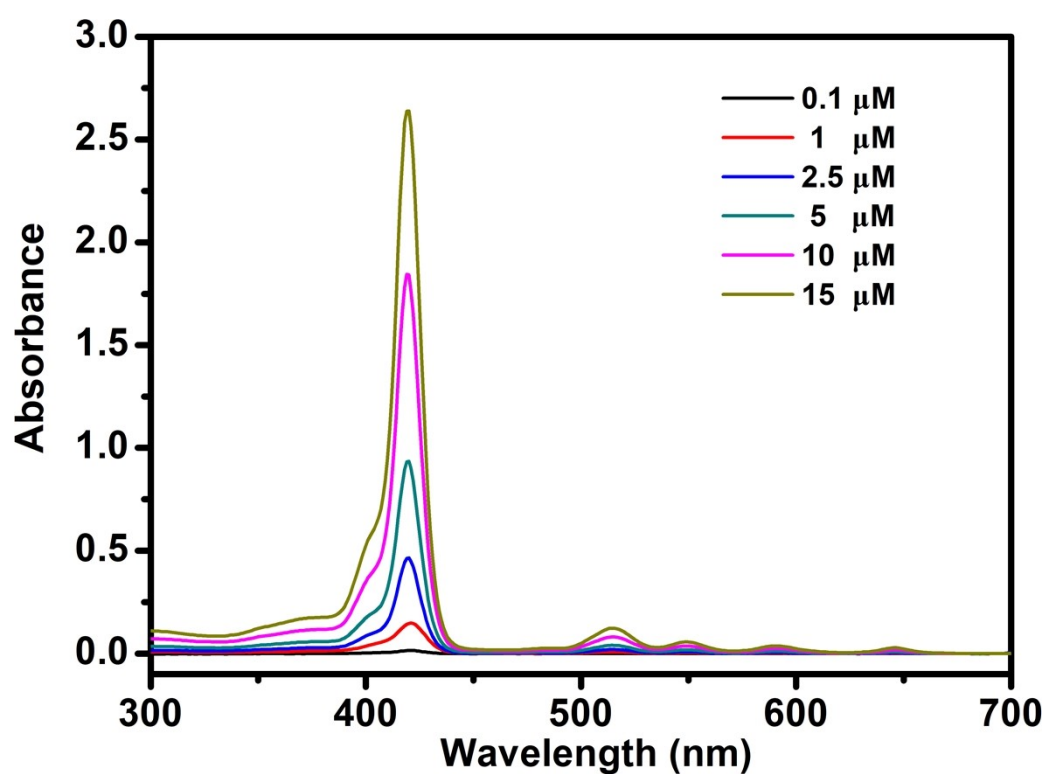

Fig. S7 The UV-vis absorption of H<sub>2</sub>TCPP with different concentrations.

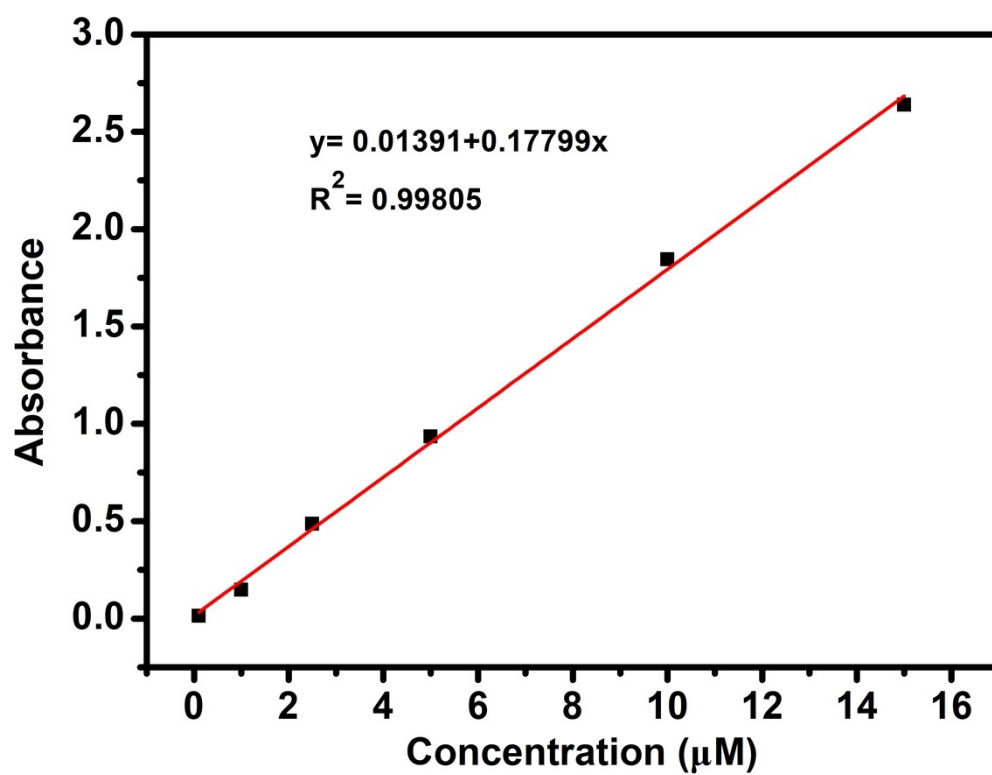

Fig. S8 Relationship between UV-vis absorption intensity and the concentration of H<sub>2</sub>TCPP.

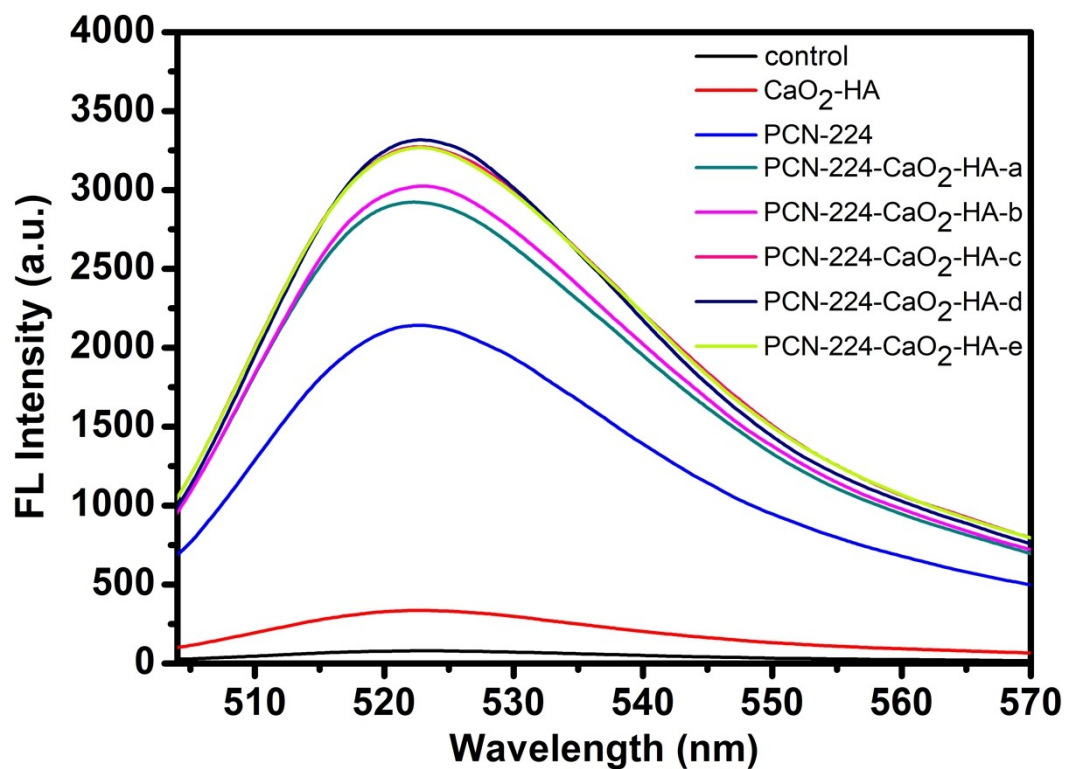

**Fig. S9** DCFH fluorescence intensity of  $\text{CaO}_2\text{-HA}$ , PCN-224 and PCN-224- $\text{CaO}_2\text{-HA}$  after LED irradiation for 6 min (PCN-224- $\text{CaO}_2\text{-HA-abcde}$  represents PCN-224 combined with different amounts of  $\text{CaO}_2$ ).

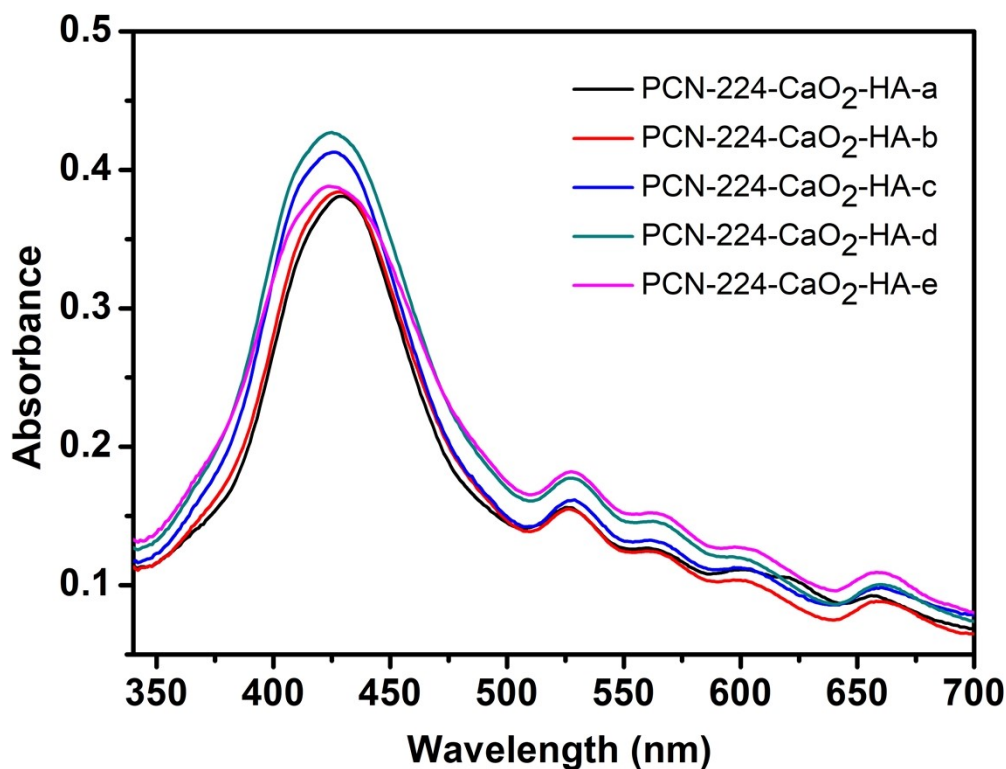

**Fig. S10** UV-vis absorption of PCN-224 combined with different amounts of  $\text{CaO}_2$ .

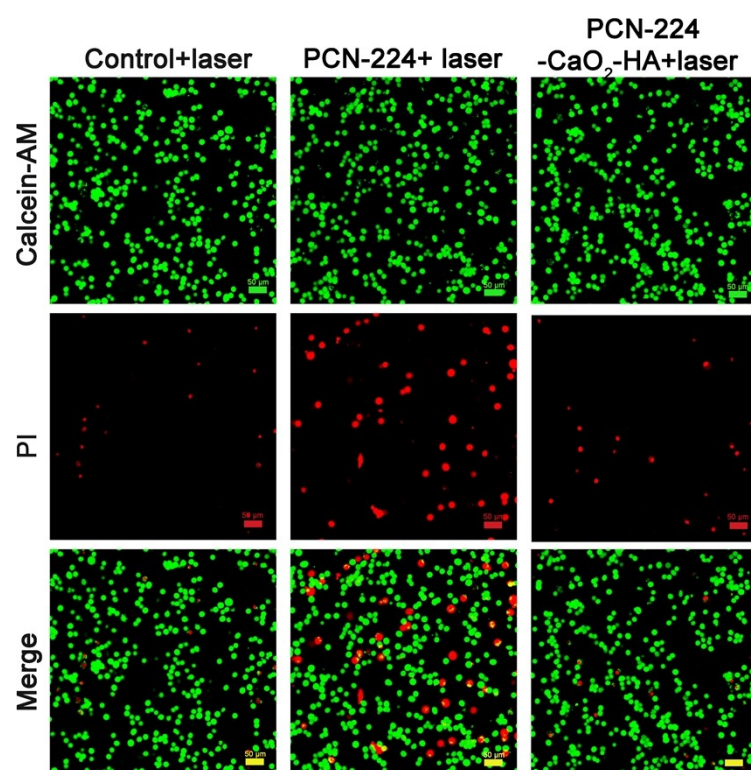

**Fig. S11** CLSM images of Calcein-AM/PI stained LO2 cells.

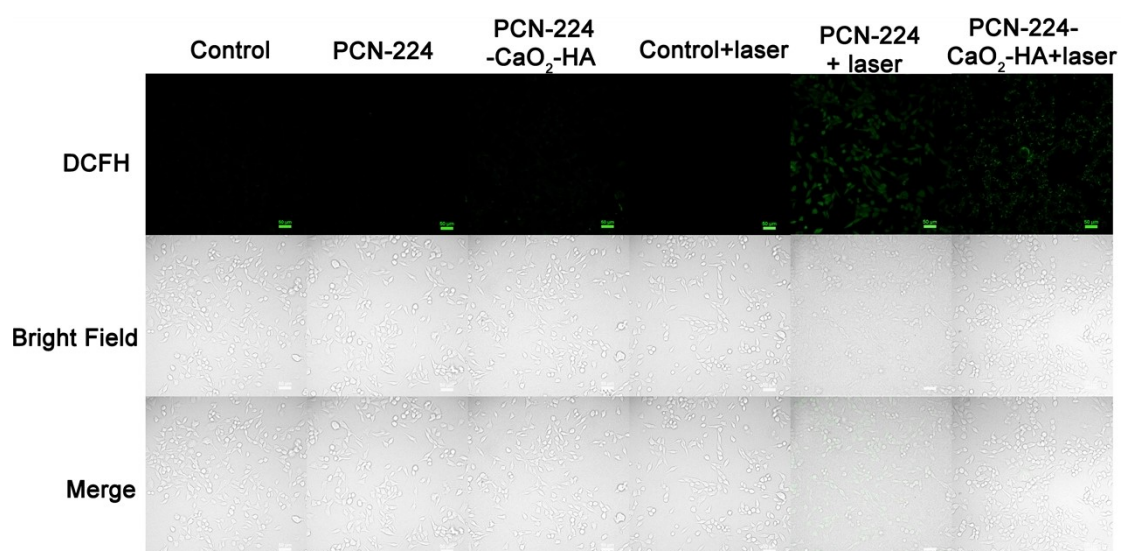

**Fig. S12.** CLSM images of ROS generation in LO2 cells.

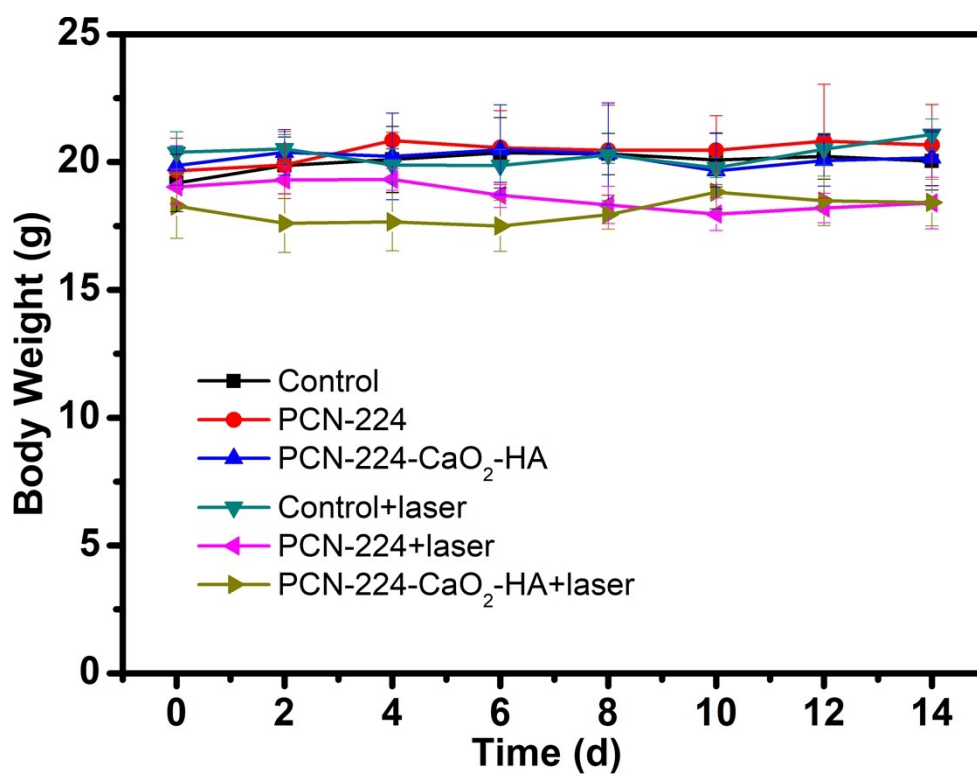

**Fig. S13** Body weight after various treatments.

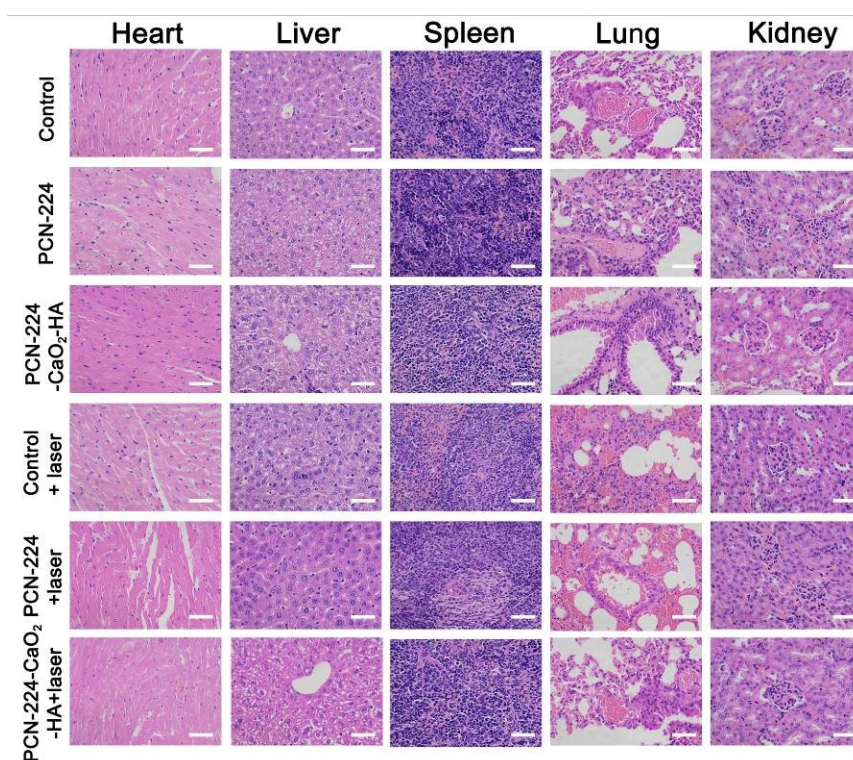

**Fig. S14** H&E stained images obtained from major organs after 14 days by intravenous injection. Scale bar, 50 µm.
